# Supplementary material for: Oxygen self-sufficient fluorinated polypeptide nanoparticles for NIR imaging-guided enhanced photodynamic therapy
Source: Royal Society of Chemistry journal article supplement (doi:10.1039/c8tb00493e), 2018-01-01
Supplement: c8tb00493e1.pdf [file c8tb00493e1.pdf]

## Supporting Information

### Oxygen Self-Sufficient Fluorinated Polypeptide Nanoparticles for NIR Imaging-Guided Enhanced Photodynamic Therapy

Pan Yuan <sup>a</sup>, Zheng Ruan <sup>a</sup>, Wei Jiang <sup>b</sup>, Le Liu <sup>a</sup>, Jiayang Dou <sup>c</sup>, Tuanwei Li <sup>a</sup>, and Lifeng Yan <sup>a,b\*</sup>

<sup>a</sup> CAS Key Laboratory of Soft Matter Chemistry, and Department of Chemical Physics, iCHEM, University of Science and Technology of China.

E-mail: [lfyan@ustc.edu.cn](mailto:lfyan@ustc.edu.cn)

<sup>b</sup> Hefei National Laboratory for Physical Sciences at the Microscale, University of Science and Technology of China, Hefei, Jinzhai road, 230026, P.R.China.

<sup>c</sup> School of Life Sciences, University of Science and Technology of China. Hefei, Huangshan road, 230027, P.R.China.

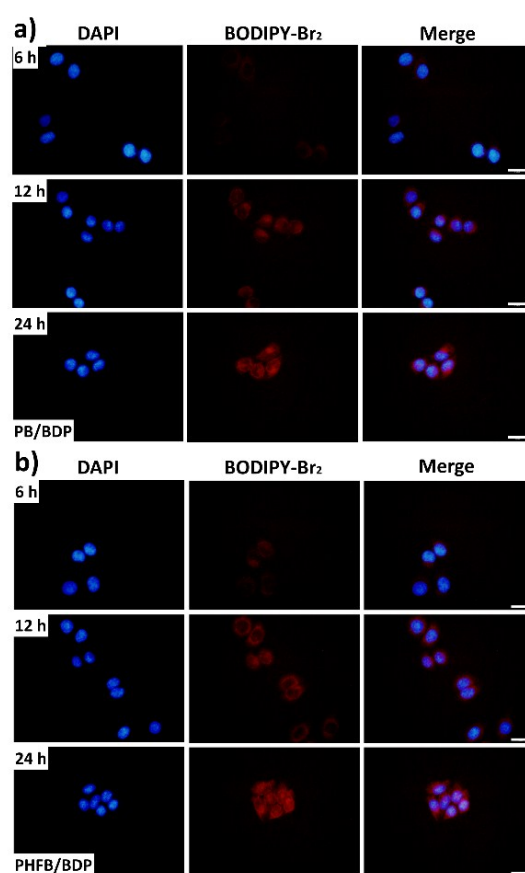

**Figure S1.** Fluorescence microscope observation of HepG2 cells incubated with PB/BDP **(a)** and PHFB/BDP **(b)** at different time points (6 h, 12 h and 24 h). Cell nuclei stained with DAPI (Blue) and the red fluorescence represented the intracellular BDP signal. Scale bar: 20 mm.

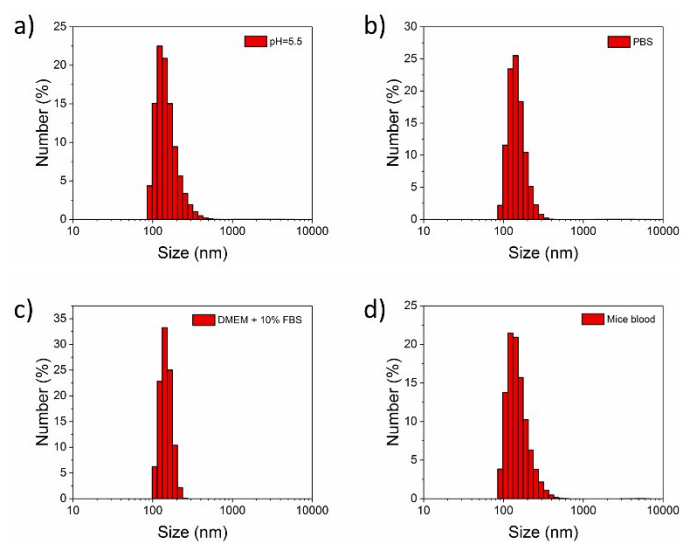

**Figure S2.** Dynamic light scattering measurements of the PHFB/BDP nanoparticles under different conditions: at **(a)** pH 5.5, **(b)** phosphate buffered solution, **(c)** dulbecco's modified eagle medium (DMEM) + 10% fetal bovine serum (FBS) and **(d)** mice blood.
